# Supplementary material for: Correlates of opium use: retrospective analysis of a survey of tribal communities in Arunachal Pradesh, India
Source: PubMed Central journal article supplement (PMC3626656; doi:10.1186/1471-2458-13-325), 2013-04-10
Supplement: 1471-2458-13-325-S1.pdf [file 1471-2458-13-325-S1.pdf]

## Basic Data Sheet

District Changlang (12), Arunachal Pradesh (12)

( Source: Census of India 2001)

### Population:

|                                |         |                                    |        |
|--------------------------------|---------|------------------------------------|--------|
| Persons                        | 125,422 | Number of households               | 24,012 |
| Males                          | 65,821  | Household size (per household)     | 5      |
| Females                        | 59,601  |                                    |        |
| Growth (1991 - 2001)           | 30.84   | Sex ratio (females per 1000 males) | 906    |
| Rural                          | 113,034 | Sex ratio (0-6 years)              | 954    |
| Urban                          | 12,388  |                                    |        |
| Scheduled Caste population     | 372     | Scheduled Tribe population         | 45,351 |
| Percentage to total population | 0.30    | Percentage to total population     | 36.16  |

### Literacy and Educational level

|                      |        |                                   |        |
|----------------------|--------|-----------------------------------|--------|
| <i>Literates</i>     |        | <i>Educational Level attained</i> |        |
| Persons              | 51,291 | Total                             | 51,291 |
| Males                | 32,789 | Without level                     | 1,311  |
| Females              | 18,502 | Below primary                     | 18,470 |
| <i>Literacy rate</i> |        | Primary                           | 13,700 |
| Persons              | 51.32  | Middle                            | 8,179  |
| Males                | 62.13  | Matric/Higher Secondary/Diploma   | 7,679  |
| Females              | 39.23  | Graduate and above                | 1,952  |

### Workers

|                  |        |                                   |        |
|------------------|--------|-----------------------------------|--------|
| Total workers    | 60,045 | <b>Age groups</b>                 |        |
| Main workers     | 49,176 | 0 - 4 years                       | 17,342 |
| Marginal workers | 10,869 | 5 - 14 years                      | 34,197 |
| Non-workers      | 65,377 | 15 - 59 years                     | 67,584 |
|                  |        | 60 years and above (Incl. A.N.S.) | 6,299  |

### Scheduled Castes (Largest three)

|                        |     |
|------------------------|-----|
| 1. Brittial-Bania etc. | 129 |
| 2. Namasudra           | 56  |
| 3. Dhupi etc.          | 42  |

### Scheduled Tribes (Largest three)

|                         |        |
|-------------------------|--------|
| 1. Tangsa               | 20,431 |
| 2. Any Naga Tribes etc. | 3,940  |
| 3. Singpho              | 3,412  |

### Religions (Largest three)

|               |        |
|---------------|--------|
| 1. Hindus     | 50,183 |
| 2. Buddhists  | 42,744 |
| 3. Christians | 21,931 |

### Amenities and infrastructural facilities

**Total inhabited villages** 336

| Amenities available in villages        | No. of villages |
|----------------------------------------|-----------------|
| Drinking water facilities              | 336             |
| Safe Drinking water                    | 307             |
| Electricity (Power Supply)             | 277             |
| Electricity (domestic)                 | 258             |
| Electricity (Agriculture)              | 1               |
| Primary school                         | 179             |
| Middle schools                         | 47              |
| Secondary/Sr Secondary schools         | 25              |
| College                                | 1               |
| Medical facility                       | 64              |
| Primary Health Centre                  | 7               |
| Primary Health Sub-Centre              | 11              |
| Post, telegraph and telephone facility | 45              |
| Bus services                           | 64              |
| Paved approach road                    | 195             |
| Mud approach road                      | 133             |

### Important Towns (Largest three)

|                   | Population |
|-------------------|------------|
| 1. Changlang (CT) | 6,469      |
| 2. Jairampur (CT) | 5,919      |

### House Type

|                                           |      |
|-------------------------------------------|------|
| Type of house (% of households occupying) |      |
| Permanent                                 | 14.9 |
| Semi-permanent                            | 11.1 |
| Temporary                                 | 73.9 |
